# Supplementary material for: Muscle-origin creatinine-cystatin C ratio is an osteoporosis marker in individuals with normal renal function: evidence from observational and Mendelian randomization analysis
Source: Front Endocrinol (Lausanne). 2024 May 21;15:1325320. doi: 10.3389/fendo.2024.1325320 (PMC11148261; doi:10.3389/fendo.2024.1325320)
Supplement: Supplementary file 9 [file Table_7.xlsx]

## Sheet: Sheet1
Supplementary Table 7 Significant SNPs in CCR GWAS
GenomicLocus	uniqID	rsID	chr	pos	p	start	end	nSNPs	nGWASSNPs	nIndSigSNPs	IndSigSNPs	nLeadSNPs	LeadSNPs
1	1:25757996:A:G	rs909834	1	25757996	4.93e-13	25580095	25863694	232	38	1	rs909834	1	rs909834
2	1:27046982:A:G	rs12729652	1	27046982	1.37e-09	26987646	27368126	76	54	3	rs12729652;rs114165349;rs4589135	1	rs12729652
3	1:28535233:C:T	rs510379	1	28535233	2.17e-08	28506065	28627526	150	1	1	rs510379	1	rs510379
4	1:29486128:C:T	rs113292219	1	29486128	3.56e-08	29245595	29566596	5	1	1	rs113292219	1	rs113292219
5	1:59663341:A:G	rs60199046	1	59663341	1.69e-08	59612507	59690602	71	23	2	rs60199046;rs331638	1	rs60199046
6	1:109940503:C:G	rs72646553	1	109940503	7.46e-12	109790286	110048527	228	100	5	rs6657811;rs6693893;rs72646553;rs1149174;rs573491	2	rs6657811;rs72646553
7	1:110470764:A:G	rs333947	1	110470764	3.28e-24	110369963	110496087	16	15	4	rs74417690;rs333947;rs9429767;rs333948	2	rs74417690;rs333947
8	1:113255456:A:C	rs34611728	1	113255456	9.8e-35	113056408	113635696	49	32	11	rs41283072;rs954679;rs36022459;rs11102523;rs34731458;rs34611728;rs34476859;rs7365248;rs80195519;rs76477170;rs41306187	3	rs41283072;rs954679;rs34611728
9	1:118162139:C:T	rs17656269	1	118162139	3.9e-10	118126621	118221817	41	20	3	rs17656269;rs7522280;rs34564754	2	rs17656269;rs7522280
10	1:120254506:A:G	rs561931	1	120254506	4.83e-08	120200606	120267597	49	1	1	rs561931	1	rs561931
11	1:150686633:A:T	rs34593358	1	150686633	1.71e-10	150571149	150861859	12	3	1	rs34593358	1	rs34593358
12	1:201016296:A:G	rs3850625	1	201016296	1.78e-23	200893960	201016296	3	3	3	rs3850625;rs71635524;rs35304341	1	rs3850625
13	1:205670369:A:T	rs6673687	1	205670369	1.09e-09	205641826	205739266	44	13	2	rs6673687;rs56276813	1	rs6673687
14	1:212500433:C:T	rs4951588	1	212500433	1.35e-08	212408780	212602176	65	2	1	rs4951588	1	rs4951588
15	1:221001142:A:C	rs61830291	1	221001142	2.03e-10	220986070	221032881	5	2	1	rs61830291	1	rs61830291
16	1:228559994:C:T	rs500049	1	228559994	1.04e-08	228559994	228559994	1	1	1	rs500049	1	rs500049
17	2:417167:C:T	rs62106258	2	417167	6.2e-14	408713	653874	243	162	3	rs62106258;rs77165542;rs13412194	2	rs62106258;rs13412194
18	2:20328245:C:T	rs59325012	2	20328245	4.09e-10	20274446	20352480	79	30	2	rs59325012;rs7558628	1	rs59325012
19	2:25053828:C:T	rs1056074	2	25053828	7.17e-15	24688055	25056908	105	19	3	rs1056074;rs13036166;rs67722327	1	rs1056074
20	2:27730940:C:T	rs1260326	2	27730940	4.71e-14	27387429	27950837	179	15	4	rs1260326;rs77200710;rs2384575;rs1728918	1	rs1260326
21	2:39183449:C:T	rs115393289	2	39183449	8.77e-09	39183449	39663124	4	3	1	rs115393289	1	rs115393289
22	2:59315020:A:G	rs4287756	2	59315020	1.72e-08	59291172	59335104	34	3	1	rs4287756	1	rs4287756
23	2:64936472:G:T	rs6733507	2	64936472	8.27e-10	64888426	65004346	74	37	1	rs6733507	1	rs6733507
24	2:73855507:G:T	rs10178409	2	73855507	2.36e-12	73546044	74004071	454	59	3	rs10178409;rs2091022;rs62149804	1	rs10178409
25	2:98364407:C:T	rs34635139	2	98364407	1.34e-10	98324381	98626286	51	10	1	rs34635139	1	rs34635139
26	2:103092906:A:G	rs7597819	2	103092906	2.33e-08	102918018	103094323	113	45	1	rs7597819	1	rs7597819
27	2:111845422:A:G	rs55711612	2	111845422	3.16e-10	111807677	111851212	18	7	1	rs55711612	1	rs55711612
28	2:128531384:C:T	rs59727076	2	128531384	1.37e-08	128468369	128620372	73	2	2	rs59727076;rs7562358	2	rs59727076;rs7562358
29	2:144332582:C:T	rs74467920	2	144332582	7.8e-10	144274923	144487473	82	43	4	rs74467920;rs5022663;rs115384872;rs74942677	2	rs74467920;rs74942677
30	2:170026596:C:T	rs4140872	2	170026596	1.8e-14	170003638	170050774	67	30	3	rs4140872;rs2229265;rs10210408	1	rs4140872
31	2:178121524:A:C	rs35284526	2	178121524	1.03e-14	178097666	178149364	55	37	4	rs35284526;rs7583487;rs2364730;rs6433659	1	rs35284526
32	2:203488449:A:G	rs10189685	2	203488449	3.63e-28	203035423	203685439	214	137	12	rs10189685;rs6435162;rs75653309;rs57454651;rs12994463;rs190148527;rs6435157;rs13006836;rs78203474;rs35637068;rs13432396;rs13035933	1	rs10189685
33	2:210819095:A:G	rs74465551	2	210819095	1.14e-09	210613444	210836323	208	17	6	rs74465551;rs17803541;rs74536512;rs10200921;rs77848341;rs7603924	2	rs74465551;rs77848341
34	2:211540507:A:C	rs1047891	2	211540507	7.68e-177	211138239	211904489	1201	899	68	rs142530465;rs62202111;rs79675564;rs10191395;rs113259035;rs112085022;rs1350463;rs9789460;rs11690895;rs10165084;rs77542832;rs13411696;rs13414563;rs10804186;rs7607412;rs200710783;rs16844516;rs145841563;rs187876534;rs72946093;rs143955150;rs17774535;rs116692731;rs114819130;rs2287598;rs1047891;rs7684;rs12476133;rs13386028;rs17775871;rs7424145;rs4673545;rs4673548;rs4673553;rs550266147;rs34259513;rs6220…	17	rs142530465;rs79675564;rs11690895;rs16844516;rs145841563;rs17774535;rs116692731;rs2287598;rs1047891;rs1016395;rs62201970;rs2371074;rs35063095;rs13019835;rs67225130;rs75255209;rs79639185
35	2:217665788:C:T	rs1548945	2	217665788	1.1e-16	217632792	217713766	91	54	4	rs1548945;rs4674118;rs1179712;rs2024488	1	rs1548945
36	2:220338065:C:T	rs4674402	2	220338065	5.58e-20	220308949	220384414	62	37	4	rs112068790;rs4674402;rs16859981;rs77449817	2	rs112068790;rs4674402
37	2:230847856:A:C	rs7577278	2	230847856	8.53e-10	230576208	230883569	142	59	3	rs7577278;rs7599184;rs17258702	1	rs7577278
38	3:38440237:C:T	rs13064938	3	38440237	3.26e-22	38417345	38574491	234	70	7	rs13064938;rs62239927;rs6779704;rs17037798;rs196376;rs146042264;rs2070988	1	rs13064938
39	3:53073314:A:C	rs71301804	3	53073314	1.8e-12	52537969	53174745	247	152	4	rs71301804;rs71301815;rs17331178;rs77572134	1	rs71301804
40	3:63979212:A:C	rs75547833	3	63979212	5.43e-09	63785159	63995611	10	8	1	rs75547833	1	rs75547833
41	3:87037543:A:G	rs13066793	3	87037543	1.76e-12	87037543	87037543	1	1	1	rs13066793	1	rs13066793
42	3:125910381:C:T	rs9862438	3	125910381	3.79e-12	125879073	125987285	123	67	4	rs9862438;rs4679215;rs10934761;rs4646700	1	rs9862438
43	3:127306462:C:T	rs79983121	3	127306462	1.78e-08	127215535	127410033	42	9	1	rs79983121	1	rs79983121
44	3:129736578:G:T	rs115865538	3	129736578	1.11e-09	129676740	129757634	49	13	2	rs115865538;rs3889530	1	rs115865538
45	3:141724644:C:T	rs2861422	3	141724644	3.25e-13	141631043	141872532	188	111	5	rs2861422;rs6798210;rs9942;rs12330323;rs57008447	2	rs2861422;rs57008447
46	3:156795468:A:G	rs13322435	3	156795468	1.44e-10	156791268	156798775	17	15	1	rs13322435	1	rs13322435
47	3:185328671:A:G	rs9714159	3	185328671	1.06e-18	185262137	185464488	138	104	8	rs9714159;rs9880232;rs57158761;rs7649167;rs143867505;rs518758;rs28889122;rs4624587	1	rs9714159
48	3:197002869:C:T	rs34121928	3	197002869	3.04e-11	196788438	197026927	93	71	1	rs34121928	1	rs34121928
49	4:10101443:C:T	rs6830786	4	10101443	7.3e-10	10032516	10166994	71	29	1	rs6830786	1	rs6830786
50	4:24801834:C:G	rs1799895	4	24801834	8.71e-15	24801834	24801834	1	1	1	rs1799895	1	rs1799895
51	4:106106353:A:C	rs10010325	4	106106353	2.32e-14	105722860	106217588	86	26	7	rs116597408;rs62329749;rs2522485;rs4698928;rs7699743;rs10010325;rs1541374	3	rs116597408;rs2522485;rs10010325
52	4:109714155:A:G	rs7692671	4	109714155	1.2e-08	109699599	109720129	39	4	1	rs7692671	1	rs7692671
53	4:140020598:A:G	rs72724724	4	140020598	2.52e-09	139927828	140161872	121	2	2	rs72724724;rs111906179	1	rs72724724
54	4:149647566:C:T	rs34022876	4	149647566	4.22e-08	149568408	149728841	128	5	1	rs34022876	1	rs34022876
55	5:38882814:C:T	rs7718112	5	38882814	3.96e-08	38882814	38887780	4	1	1	rs7718112	1	rs7718112
56	5:39393733:A:G	rs10062079	5	39393733	2.55e-31	39196275	39437129	254	219	22	rs152255;rs266889;rs1070306;rs10941431;rs534663;rs10035891;rs2367865;rs6882168;rs34793804;rs10461725;rs700184;rs696743;rs457671;rs111481858;rs75459462;rs13179493;rs10062079;rs34525658;rs3909471;rs10941432;rs138533851;rs115686877	4	rs152255;rs111481858;rs10062079;rs138533851
57	5:53276301:A:G	rs1664781	5	53276301	6.97e-26	53256679	53405314	228	153	10	rs1664781;rs1694055;rs114118094;rs1067530;rs10805455;rs702640;rs80138475;rs40480;rs112439104;rs255746	3	rs1664781;rs80138475;rs255746
58	5:68043015:A:G	rs68101867	5	68043015	4.27e-08	68036771	68225108	59	19	1	rs68101867	1	rs68101867
59	5:76539997:C:T	rs10056404	5	76539997	9.29e-09	76515824	76547212	26	1	1	rs10056404	1	rs10056404
60	5:82815170:A:G	rs61749613	5	82815170	1.58e-10	82810884	82815170	3	3	1	rs61749613	1	rs61749613
61	5:90619868:C:T	rs6880312	5	90619868	2.79e-09	90579633	90642230	42	12	1	rs6880312	1	rs6880312
62	5:96275166:C:T	rs2432141	5	96275166	1.77e-12	96200770	96408194	509	252	3	rs2432141;rs60218205;rs139086235	2	rs2432141;rs60218205
63	5:131998876:A:G	rs1295683	5	131998876	5.63e-12	131590257	131998876	228	58	7	rs1012793;rs272889;rs12153431;rs144984936;rs10479001;rs1295683;rs20541	4	rs1012793;rs12153431;rs144984936;rs1295683
64	5:139971188:A:G	rs4279384	5	139971188	3.91e-08	139730444	140019921	94	3	1	rs4279384	1	rs4279384
65	5:176790807:A:G	rs116402366	5	176790807	2.02e-37	176456371	176991871	14	10	5	rs116402366;rs114650010;rs55653163;rs35367652;rs62397226	1	rs116402366
66	6:7231843:A:G	rs9379084	6	7231843	6.45e-21	7107404	7326481	179	80	20	rs1285885;rs1285881;rs34884023;rs2714342;rs2714345;rs9379084;rs11243146;rs41302867;rs9502577;rs9502582;rs2764093;rs76623841;rs9392863;rs147287945;rs2714338;rs2714344;rs2714346;rs3778330;rs6936191;rs35742417	3	rs1285885;rs9379084;rs2714338
67	6:18438876:C:T	rs6927687	6	18438876	4.22e-08	18419944	18468114	7	2	1	rs6927687	1	rs6927687
68	6:26093141:A:G	rs1800562	6	26093141	3.33e-14	25616453	26338257	79	17	3	rs1800562;rs78833965;rs7746807	2	rs1800562;rs7746807
69	6:33687007:A:G	rs942641	6	33687007	3.51e-08	33648690	33718075	102	1	1	rs942641	1	rs942641
70	6:34244132:C:T	rs115245297	6	34244132	6.54e-10	34141700	34381136	80	57	2	rs115245297;rs77393224	1	rs115245297
71	6:43396856:A:C	rs4714684	6	43396856	1.22e-24	41965153	43697832	188	103	13	rs146734164;rs117960583;rs142387478;rs2756176;rs62415416;rs754421;rs732692;rs111981370;rs79009481;rs2396025;rs1214748;rs80320191;rs4714684	4	rs146734164;rs2756176;rs79009481;rs4714684
72	6:82464216:G:T	rs9361858	6	82464216	7.82e-25	82395955	82851630	167	61	12	rs41270569;rs78930536;rs75695982;rs11969014;rs9361858;rs194932;rs194943;rs915125;rs10806236;rs13193507;rs10943857;rs13203325	3	rs41270569;rs9361858;rs10806236
73	6:100620931:C:T	rs17185536	6	100620931	1.61e-18	100600097	100629078	6	5	1	rs17185536	1	rs17185536
74	6:131212007:A:G	rs3777446	6	131212007	1.62e-14	131123556	131420459	151	88	3	rs3777446;rs6903450;rs986267	1	rs3777446
75	6:131893247:A:T	rs2781665	6	131893247	3.55e-10	131812816	131905815	150	20	2	rs2781665;rs2608917	1	rs2781665
76	6:133799723:A:G	rs9385649	6	133799723	1.09e-19	133087081	133866326	499	322	13	rs4395734;rs117006327;rs9483554;rs62430314;rs117808688;rs12530317;rs1856293;rs9385649;rs2277083;rs13212719;rs41286206;rs9483586;rs56310136	3	rs4395734;rs9483554;rs9385649
77	6:160648923:A:G	rs12205178	6	160648923	6.05e-54	159965802	161141740	571	393	46	rs151230786;rs181839190;rs151198444;rs648253;rs671439;rs73023687;rs8191910;rs7760552;rs58458113;rs148098552;rs9457843;rs408889;rs662138;rs707771;rs2297374;rs3777392;rs112533621;rs7774140;rs3798158;rs12205178;rs3119312;rs2481031;rs12209517;rs146184004;rs12209391;rs791198;rs150856119;rs3127606;rs316009;rs316035;rs533452;rs505111;rs13220146;rs71565769;rs77297894;rs421913;rs6914575;rs1321195;rs653753…	16	rs151230786;rs648253;rs7760552;rs662138;rs2297374;rs112533621;rs3798158;rs12205178;rs3127606;rs316009;rs662421;rs62440361;rs143527410;rs112376176;rs2504920;rs191802100
78	7:17285867:C:G	rs10281571	7	17285867	3.8e-08	17280513	17338147	7	2	1	rs10281571	1	rs10281571
79	7:128573967:A:G	rs4728142	7	128573967	4.18e-12	128567032	128581835	14	13	1	rs4728142	1	rs4728142
80	8:9173358:A:G	rs7012814	8	9173358	5.48e-19	9007273	11712639	728	171	16	rs7012814;rs10106829;rs10102352;rs10095103;rs13268219;rs10095236;rs560638;rs330939;rs62493792;rs4240624;rs11783641;rs7005363;rs34389419;rs10903343;rs1293331;rs7823651	4	rs7012814;rs4240624;rs7005363;rs10903343
81	8:17419461:A:G	rs56335308	8	17419461	4.99e-08	17419074	17445955	12	1	1	rs56335308	1	rs56335308
82	8:109364314:C:T	rs56980476	8	109364314	3.93e-08	109346827	109424327	17	1	1	rs56980476	1	rs56980476
83	8:110097843:C:T	rs3110038	8	110097843	3.94e-08	110085366	110106809	36	1	1	rs3110038	1	rs3110038
84	8:126475770:A:G	rs6999569	8	126475770	5.23e-17	126456376	126508568	95	27	2	rs6999569;rs13258507	1	rs6999569
85	8:145018354:C:T	rs11786896	8	145018354	1.85e-16	144965498	145556388	19	13	4	rs11786896;rs77911607;rs67384412;rs72693377	1	rs11786896
86	9:16446156:A:C	rs4961718	9	16446156	1.94e-09	16399953	16468305	44	2	1	rs4961718	1	rs4961718
87	9:33109149:A:C	rs13296330	9	33109149	7.09e-14	33107797	33186788	95	84	3	rs13296330;rs13297246;rs6476398	2	rs13296330;rs6476398
88	9:33971312:C:G	rs307677	9	33971312	2.95e-08	33664300	34046808	109	36	1	rs307677	1	rs307677
89	9:71431174:A:T	rs7042786	9	71431174	1.24e-08	71397747	71475381	17	5	1	rs7042786	1	rs7042786
90	9:136146597:C:T	rs550057	9	136146597	7.71e-10	136137065	136149500	37	1	1	rs550057	1	rs550057
91	9:136934101:G:T	rs10821545	9	136934101	2.95e-11	136924744	136942560	67	50	1	rs10821545	1	rs10821545
92	9:139101772:A:G	rs7031621	9	139101772	3.21e-21	139082491	139110654	42	37	4	rs7031621;rs11103387;rs57912120;rs1886296	1	rs7031621
93	10:65273534:A:G	rs55666908	10	65273534	2.01e-11	64848797	65400231	465	258	5	rs55666908;rs2565187;rs9888066;rs10995447;rs7916868	1	rs55666908
94	10:69964794:C:T	rs12785105	10	69964794	1.41e-08	69912278	69965177	101	38	1	rs12785105	1	rs12785105
95	10:70375991:C:T	rs2664421	10	70375991	3.42e-09	70324448	70412883	84	53	2	rs2664421;rs7897823	1	rs2664421
96	10:93597351:A:G	rs1770476	10	93597351	4.43e-08	93449360	93650113	104	18	1	rs1770476	1	rs1770476
97	11:27593570:A:G	rs12269837	11	27593570	3.89e-09	27477864	27723334	57	29	1	rs12269837	1	rs12269837
98	11:65143892:A:G	rs34400381	11	65143892	2.34e-13	64930026	65305309	14	6	2	rs34400381;rs78829599	2	rs34400381;rs78829599
99	11:66279546:C:T	rs11227506	11	66279546	2.5e-09	66196265	66339683	121	1	1	rs11227506	1	rs11227506
100	11:69993334:C:G	rs77652224	11	69993334	1.16e-08	69971277	70063449	50	7	2	rs77652224;rs2186797	1	rs77652224
101	11:78135229:C:T	rs11237490	11	78135229	4.19e-15	77909014	78287352	683	291	6	rs11237490;rs113803935;rs4944209;rs7929656;rs2512527;rs1981405	1	rs11237490
102	11:128337435:C:T	rs11221318	11	128337435	1.47e-09	128336606	128398309	14	10	3	rs11221318;rs10893877;rs4937341	2	rs11221318;rs4937341
103	12:349298:C:T	rs10774021	12	349298	1.73e-27	345175	554331	114	39	7	rs10774021;rs487252;rs523169;rs55657100;rs512147;rs555512;rs11062929	1	rs10774021
104	12:3375780:A:G	rs73048927	12	3375780	3.79e-19	3328866	3397746	129	59	8	rs73045497;rs16930370;rs73048927;rs605613;rs71577846;rs73048979;rs571206;rs646346	3	rs73045497;rs73048927;rs571206
105	12:48703091:A:C	rs1387260	12	48703091	1.42e-09	48375568	48780358	168	71	3	rs1387260;rs4760612;rs10875751	1	rs1387260
106	12:89776485:A:G	rs770082	12	89776485	2.13e-08	89726027	89776845	13	2	1	rs770082	1	rs770082
107	12:112090022:A:C	rs10744774	12	112090022	1.75e-35	110308628	113273677	1074	345	46	rs73191844;rs12231451;rs876373;rs933296;rs571761181;rs7316287;rs7311323;rs12828640;rs3809272;rs139330710;rs4766453;rs59072658;rs4375492;rs11065898;rs659964;rs77215829;rs151151099;rs117532831;rs73207626;rs536692416;rs56390488;rs568138693;rs191673261;rs188733198;rs545998966;rs10744774;rs2141089;rs11610922;rs150349412;rs140040372;rs117279756;rs188838656;rs117102609;rs140434027;rs141105880;rs73207624…	20	rs73191844;rs571761181;rs7316287;rs12828640;rs139330710;rs4766453;rs11065898;rs151151099;rs536692416;rs56390488;rs568138693;rs10744774;rs150349412;rs140040372;rs117102609;rs140434027;rs73207624;rs233726;rs7313341;rs7970581
108	12:121416988:A:G	rs2244608	12	121416988	8.6e-27	121045601	121489586	340	136	16	rs550493983;rs143171220;rs80019595;rs2244608;rs1169286;rs9738226;rs56348580;rs1169302;rs11065394;rs61953351;rs2708081;rs3213545;rs2393750;rs2859398;rs2708101;rs28380723	2	rs550493983;rs2244608
109	13:27732252:C:T	rs6491185	13	27732252	4.87e-08	27631155	27875375	104	1	1	rs6491185	1	rs6491185
110	13:28604007:C:T	rs76428106	13	28604007	3.64e-13	28604007	28761592	4	4	4	rs76428106;rs79490353;rs144937240;rs145096717	1	rs76428106
111	13:49744296:A:G	rs60569686	13	49744296	2.06e-28	49420418	49966725	213	114	10	rs60569686;rs3764130;rs73186871;rs147074243;rs77162029;rs116921477;rs2596244;rs9535121;rs7333097;rs74423421	1	rs60569686
112	13:50224143:C:T	rs7139531	13	50224143	4.52e-08	50221887	50231784	6	1	1	rs7139531	1	rs7139531
113	13:50845045:C:G	rs113248359	13	50845045	1.18e-10	50786416	51169561	123	67	3	rs113248359;rs78421831;rs1239682	2	rs113248359;rs1239682
114	13:74109631:A:G	rs17287088	13	74109631	1.56e-09	74104887	74196887	96	18	2	rs17287088;rs9543400	1	rs17287088
115	14:50655357:C:G	rs72681869	14	50655357	3.47e-16	50655307	51207741	8	6	4	rs72681869;rs72683923;rs72681698;rs61755579	1	rs72681869
116	14:80604864:C:T	rs145995745	14	80604864	7.16e-16	79892600	81817110	25	9	5	rs145995745;rs180927050;rs539688931;rs146587510;rs534730950	1	rs145995745
117	14:93118229:C:T	rs117068593	14	93118229	7.45e-10	93069980	93118229	32	22	1	rs117068593	1	rs117068593
118	14:94844947:C:T	rs28929474	14	94844947	2.75e-17	94838142	94844947	2	2	1	rs28929474	1	rs28929474
119	14:100763369:A:G	rs72711990	14	100763369	1.37e-09	100759277	100772800	8	5	1	rs72711990	1	rs72711990
120	14:101998443:C:G	rs11626434	14	101998443	3.12e-11	101996529	101999598	5	4	1	rs11626434	1	rs11626434
121	14:103984537:C:T	rs911549	14	103984537	3.36e-09	103849715	104006716	119	5	1	rs911549	1	rs911549
122	15:41159305:C:T	rs72735657	15	41159305	4.12e-08	41159305	41159305	1	1	1	rs72735657	1	rs72735657
123	15:45670851:A:G	rs7164139	15	45670851	8.69e-154	45188866	46114813	752	166	51	rs56838826;rs1863469;rs16977754;rs76275337;rs7181715;rs12905418;rs62025163;rs62025168;rs139617547;rs79458803;rs55904415;rs79484914;rs12440560;rs117618181;rs140551095;rs11070443;rs7164139;rs117332547;rs3737267;rs12592862;rs2453531;rs79876890;rs11070460;rs12907319;rs12909221;rs4776162;rs78820176;rs2670806;rs538617771;rs16952708;rs12903181;rs144138935;rs145770775;rs146625690;rs534994376;rs140824560;…	12	rs56838826;rs12905418;rs139617547;rs7164139;rs144138935;rs534994376;rs140824560;rs75585097;rs117168857;rs636910;rs146835642;rs57974632
124	15:49321529:C:T	rs11638981	15	49321529	8.3e-11	49272084	49912768	272	41	3	rs11638981;rs12592277;rs35426934	2	rs11638981;rs35426934
125	15:72473928:C:T	rs12898585	15	72473928	6.46e-10	72103427	73150903	367	69	2	rs12898585;rs11853541	1	rs12898585
126	15:84703874:A:G	rs11637666	15	84703874	1.84e-09	84641125	85377441	346	65	2	rs11637666;rs713468	1	rs11637666
127	15:93501398:A:T	rs4778061	15	93501398	1.86e-08	93425874	93549833	35	2	1	rs4778061	1	rs4778061
128	15:99263274:C:T	rs8038015	15	99263274	1.56e-08	99248018	99296459	76	14	1	rs8038015	1	rs8038015
129	16:730955:A:T	rs72773412	16	730955	6.7e-09	691241	741837	10	3	1	rs72773412	1	rs72773412
130	16:2151064:C:G	rs36103164	16	2151064	4.6e-10	2132731	2200184	75	6	2	rs36103164;rs74331768	1	rs36103164
131	16:11194080:C:T	rs3862469	16	11194080	1.04e-10	11031741	11279913	237	78	4	rs3862469;rs8063318;rs13339285;rs12924259	1	rs3862469
132	16:28847246:C:T	rs12928404	16	28847246	5.69e-13	28338039	29019356	420	177	5	rs12928404;rs11643297;rs4788116;rs2726036;rs149278	1	rs12928404
133	16:53802494:C:T	rs11642015	16	53802494	1.22e-17	53797908	53848561	127	100	2	rs11642015;rs7190492	1	rs11642015
134	16:68312864:A:G	rs9925773	16	68312864	6.16e-15	67367829	68431756	179	133	8	rs9925773;rs9788810;rs1131933;rs12927428;rs9940558;rs1111232;rs35482869;rs4627335	1	rs9925773
135	16:71990781:C:T	rs12447423	16	71990781	7.71e-09	71579667	72025429	76	15	2	rs12447423;rs7501228	1	rs12447423
136	16:79578564:A:G	rs142012446	16	79578564	3.78e-11	79553995	79584245	29	17	1	rs142012446	1	rs142012446
137	16:81091020:G:T	rs35096487	16	81091020	2.62e-09	81064387	81140155	215	93	1	rs35096487	1	rs35096487
138	17:1625892:A:G	rs57937546	17	1625892	1.52e-10	1618135	1636577	13	6	1	rs57937546	1	rs57937546
139	17:19474875:C:T	rs111653425	17	19474875	2.31e-47	18915263	19604243	33	23	9	rs139356332;rs76578497;rs190994819;rs76576684;rs138749087;rs2453580;rs111653425;rs190063668;rs191767619	3	rs139356332;rs2453580;rs111653425
140	17:29519404:C:G	rs2952990	17	29519404	1.44e-10	29389026	29728284	298	55	2	rs2952990;rs72813627	1	rs2952990
141	17:37716771:C:G	rs4795384	17	37716771	4.51e-42	37351041	38126231	957	422	23	rs35289683;rs12935933;rs72825201;rs1136201;rs3764354;rs4795384;rs4795385;rs1877032;rs9972882;rs2941520;rs17676191;rs1008723;rs16530;rs16541;rs55771778;rs72823393;rs117362920;rs141489261;rs117097909;rs62068169;rs192819848;rs3894194;rs870829	4	rs35289683;rs4795384;rs141489261;rs3894194
142	17:46918204:A:G	rs612720	17	46918204	1.88e-08	46890963	46955089	44	6	1	rs612720	1	rs612720
143	17:54773238:G:T	rs227731	17	54773238	4.72e-09	54741088	54786036	69	24	4	rs227731;rs227722;rs11868605;rs4794656	1	rs227731
144	17:57955071:A:G	rs1292048	17	57955071	2.74e-17	57557750	58061540	349	126	4	rs1292048;rs1292067;rs112911630;rs8078424	1	rs1292048
145	17:59448945:A:G	rs1010269	17	59448945	6.89e-40	59031542	59534377	206	58	11	rs8073894;rs1010269;rs2079742;rs7215775;rs201268638;rs9905610;rs2286525;rs60261365;rs9905385;rs4968558;rs12944985	4	rs8073894;rs1010269;rs2286525;rs12944985
146	17:66453305:C:G	rs71378928	17	66453305	1.62e-13	66385201	66505856	104	83	9	rs71378928;rs869657;rs2952282;rs4530198;rs72847770;rs4471747;rs2011143;rs11867297;rs888298	1	rs71378928
147	18:22632927:C:T	rs9963409	18	22632927	1.17e-08	22628167	22632927	2	1	1	rs9963409	1	rs9963409
148	18:42244804:A:G	rs2852771	18	42244804	8.89e-10	42193553	42299345	75	55	4	rs2852771;rs34586968;rs4890487;rs67973517	1	rs2852771
149	18:59349827:A:C	rs9957590	18	59349827	1.58e-19	59240251	59385675	88	46	4	rs9957590;rs111900668;rs8084777;rs189866006	1	rs9957590
150	18:71936464:A:G	rs7239151	18	71936464	4.09e-10	71908297	71982461	117	49	1	rs7239151	1	rs7239151
151	19:13038415:A:G	rs3111316	19	13038415	3.56e-14	12999458	13213749	79	48	3	rs3111316;rs12151248;rs73925240	2	rs3111316;rs12151248
152	19:18218610:A:T	rs67234314	19	18218610	2.06e-15	18158423	18408519	206	126	8	rs845371;rs447259;rs718784;rs67234314;rs10410017;rs4808766;rs10406080;rs62123561	2	rs845371;rs67234314
153	19:36342212:C:T	rs3814995	19	36342212	2.98e-08	36342212	36346604	4	1	1	rs3814995	1	rs3814995
154	19:49217261:A:G	rs281385	19	49217261	3.94e-12	49215194	49257739	12	4	3	rs281385;rs4021;rs60068692	2	rs281385;rs60068692
155	19:54759361:C:T	rs12975366	19	54759361	1e-09	54752217	54759666	6	2	1	rs12975366	1	rs12975366
156	20:23591610:A:G	rs62208864	20	23591610	2.64e-308	19590849	26319535	6629	3098	574	rs6046391;rs541534959;rs62218916;rs62219586;rs8125544;rs80346074;rs376814380;rs34210444;rs181659469;rs188017450;rs142194437;rs71336745;rs34851129;rs79537468;rs145247373;rs13039597;rs34253978;rs35891219;rs71336771;rs13037250;rs112581924;rs113460735;rs139683951;rs185318986;rs182128807;rs71336769;rs6082726;rs185821640;rs148417878;rs545722675;rs118182967;rs151218119;rs187519077;rs138533815;rs2424455;…	198	rs6046391;rs541534959;rs62218916;rs376814380;rs181659469;rs188017450;rs71336745;rs79537468;rs13039597;rs13037250;rs112581924;rs71336769;rs6082726;rs185821640;rs151218119;rs4815130;rs56161322;rs529952968;rs6075966;rs6048363;rs28506032;rs6113833;rs75701644;rs183778838;rs145390173;rs17748988;rs116996475;rs138198919;rs6048489;rs1431678;rs6113897;rs71338648;rs11696919;rs56354707;rs149355047;rs14879122…
157	20:30340607:C:T	rs146299514	20	30340607	1.27e-17	29420066	31050805	610	120	13	rs6088273;rs6118977;rs6119122;rs4911210;rs2056989;rs116940917;rs73102633;rs186617250;rs117430488;rs77679029;rs146299514;rs148715154;rs181555669	4	rs6088273;rs116940917;rs146299514;rs181555669
158	20:33748253:A:T	rs6058198	20	33748253	1.64e-31	32730303	33885155	1181	790	23	rs6059684;rs73610830;rs13044413;rs6088519;rs6059987;rs6088582;rs6060057;rs55845370;rs6088659;rs3736802;rs117516367;rs6058198;rs4911474;rs2425024;rs8120559;rs2425052;rs45465702;rs6120777;rs2273636;rs6060243;rs112928119;rs56289635;rs11696548	4	rs6059684;rs117516367;rs6058198;rs11696548
159	20:36835980:A:T	rs550330134	20	36835980	1.09e-08	36005534	37546969	10	1	1	rs550330134	1	rs550330134
160	20:62148839:C:T	rs73150438	20	62148839	1.33e-08	62148839	62148839	1	1	1	rs73150438	1	rs73150438
161	21:30678072:A:G	rs1153280	21	30678072	1.78e-08	30615935	30740394	27	3	1	rs1153280	1	rs1153280
162	22:21945978:A:G	rs73166630	22	21945978	7.84e-12	20946446	22909863	349	26	1	rs73166630	1	rs73166630
163	22:27978888:C:G	rs738755	22	27978888	7.02e-09	27977955	27978888	5	4	1	rs738755	1	rs738755
164	22:30424863:C:G	rs41173	22	30424863	5.22e-12	29905277	30594803	442	151	5	rs41173;rs465742;rs9613968;rs9608806;rs140140	1	rs41173
165	22:40891048:A:T	rs56182212	22	40891048	1.74e-16	40378567	41050013	524	290	12	rs5995793;rs28494590;rs3091342;rs714008;rs8135759;rs9607721;rs56182212;rs12483853;rs73165091;rs117820381;rs73167022;rs56253436	3	rs5995793;rs8135759;rs56182212
166	22:41774381:A:G	rs9611569	22	41774381	9.75e-15	41408754	42361336	750	404	6	rs9611569;rs148537066;rs6002503;rs1883826;rs11703813;rs1023498	3	rs9611569;rs11703813;rs1023498
Note: GenomicLocus : Index of genomic rick loci; uniqID : Unique ID of SNPs consists of chr:position:allele1:allele2 where alleles are alphabetically ordered; rsID : rsID of the top lead SNP; chr : chromosome of top lead SNP; pos : position of top lead SNP on hg19; p : P-value of top lead SNP (from the input file); start : Start position of the locus; end : End position of the locus; nSNPs : Numb…
